# Supplementary material
Source: ML conference proceedings conference paper supplement (https://openreview.net/forum?id=PbvPwiySXz)
Supplement: supplementary_material [file attachment]

## Appendix

### A Reproducibility Statement

We used the FFCV-SSL package by [Bordes et al.](#), built on [Leclerc et al.](#)'s FFCV package to ensure full reproducibility in terms of the SGD noise, see [subsection A.1](#) for more details.

#### A.1 Data Loader Reproducibility

The data ordering affects stochastic gradient based methods and hence connectivity. To ensure our runs can be reproduced we pick a trainer seed for initialization, data loader seed that determines ordering and an augmentation seed used for random augmentations. We include two sample CIFAR-10 data loaders in [Figure 4](#).

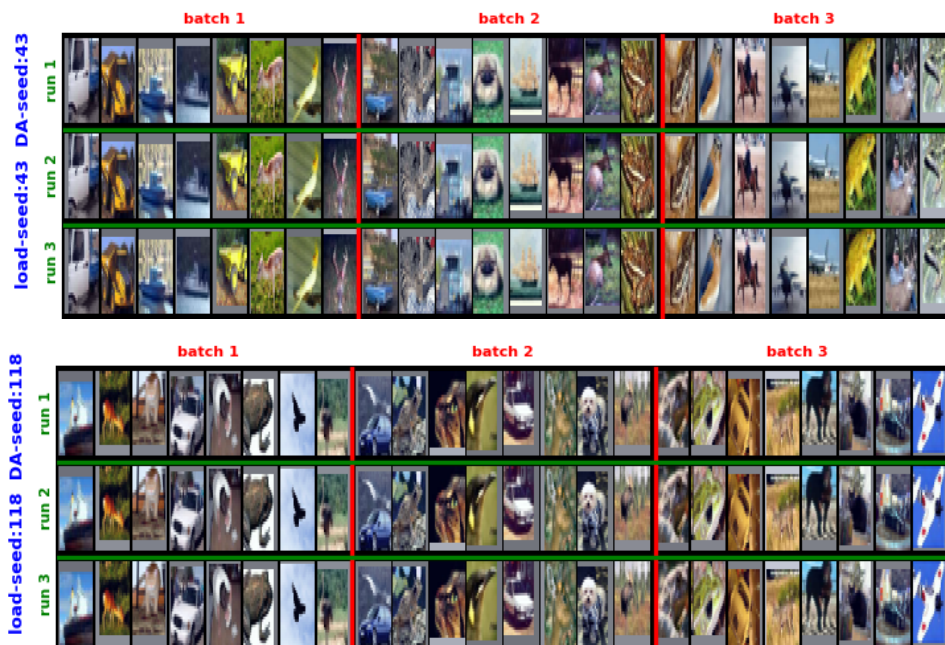

Figure 4: Each data loader is initialized three times with loader seed (used for data ordering) and data augmentation seed (used for random augmentations) set to 43 (top) and 118 (bottom). Augmentations used: random translate and horizontal flip

### B Related Work

This appendix provides a brief overview of the relevant literature.

**Mode-Connectivity:** [Garipov et al.](#), [Draxler et al.](#) demonstrated that optima trained from different initializations can be connected with simple parametric curves, e.g., polygonal chains or Bezier curves, without incurring a significant increase in the loss along this path. [Benton et al.](#) showed that these paths can be extended to probabilistic volumes of low loss. [Simsek et al.](#) formalized these volumes for over-parameterized networks as the *Global Minima Manifold* and provided explicit descriptions of its dimensions.

**Linear Mode-Connectivity:** A parallel line of work, explore *linear* mode-connectivity (LMC), where a linear path of near-constant error exists between the two optima. [Frankle et al.](#) show that two fully-connected networks trained from the same initialization but with different SGD noise, i.e. data order and augmentations, are stable to the noise and converge to linearly connected minima. Their results extend to more complex vision algorithms as well if the two networks are trained with the

197 same SGD noise for a while and then More recently [Zhou et al.](#) coined Layerwise Linear Feature  
 198 Connectivity (LLFC), a stronger setting where the feature maps of every layer also exhibit LMC.

199 **Permutation Invariance:** The permutation symmetry of the hidden neurons and how the learned  
 200 parameters interact with each other after accounting for the permutation has also emerged as a notable  
 201 avenue of inquiry. [Entezari et al.](#)'s initial conjecture argued that in most cases SGD converges  
 202 to the same basin up-to permutation and showed the emergence of LMC for wide and shallow  
 203 architectures after accounting for the permutation invariance. [Ainsworth et al.](#) proposed a general  
 204 weight matching algorithm to align models trained from different initializations that supported  
 205 [Entezari et al.](#)'s conjecture on ResNets as well. [Benzing et al.](#) show that two models exhibit linear  
 206 mode-connectivity at initialization when merged with the permutation found later in training.

## 207 C Further Training Strategies

208 This appendix presents some ablation studies regarding the training techniques and optimization.

209 Although we examined the effect of other regularization techniques, our preliminary experiments  
 210 proved these three dimensions to be the most important for LMC across different architectures.  
 211 For example, varying the batch size, turning off momentum, adding a weight decay term or cosine  
 212 learning rate scheduler doesn't have a significant impact on the behavior of the previous settings. We  
 213 found that gradient clipping can also be used to preserve LMC.

### 214 C.1 ADAM on MLPs

215 Since ADAM already breaks LMC in deeper linear models, we find it trivial that it also doesn't  
 216 preserve LMC in MLPs. Still, for completeness we provide the performance-aware barrier for MNIST  
 217 and CiFAR-10 in [Figure 5](#)

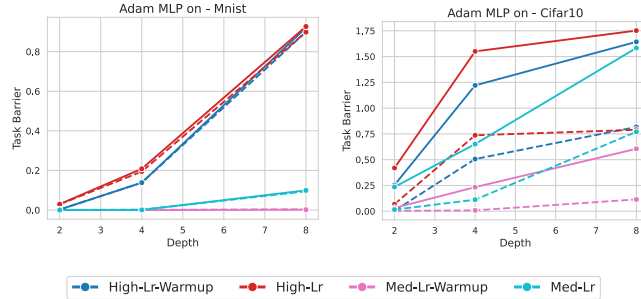

Figure 5: Task barrier for MLPs trained with ADAM on MNIST (left) and CiFAR-10 (right)

## 218 D Architectural Correspondence

219 Similar to [Neyshabur](#) we study shallow convolutions and establish their MLP counterpart based on  
 220 the Toeplitz representation of the underlying convolutional layer. For simplicity, we set stride equal to  
 221 the kernel size and do not use 0-padding. A convolutional layer operating on a  $C_i \times H \times W$  input with  
 222 kernel size  $(k_1, k_2)$  and  $C_o$  filters has  $C_o \times C_i \times k_1 \times k_2$  parameters. Its locally connected counterpart  
 223 uses different kernels to compute each target pixel, hence it has  $C_o \times H' \times W' \times C_i \times k_1 \times k_2$   
 224 parameters, where  $H', W'$  is the output spatial dimension of the resulting feature map. Both of them  
 225 can be embedded in a  $C_o \cdot H' \cdot W' \times C_i \cdot H \cdot W$  linear layer. [Table 3](#) shows the total number of  
 226 parameters for a 2-Layer network, where the first layer is either a convolution, locally connected or  
 227 linear layer whose weights can be represented with the same Toeplitz matrix. Note that ViTs could  
 228 also be considered in this framework thanks to [Cordonnier et al.](#), however we leave it to future work  
 229 to study the exact correspondence.

230 **ViT-like MLP** To study the effect of attention on LMC, we consider the simplest setting of a  
 231 ViT. We don't modify the patch embeddings, normalizations and the classifier layer but simplify the  
 232 encoder. We remove skip connections and the MLP part (last two linear layers) from the transformer

Table 3: Parameter Count (M) for a 2-Layer Network where the first layer is either a CNN/LC-CNN/Linear equivalent to kernel size=4, padding=0

|        |       |
|--------|-------|
| CNN    | 0.09  |
| LC-CNN | 0.48  |
| MLP    | 25.26 |

233 encoder block and only use one block. We use patch size of 4 to establish similarity to the (LC)-CNN  
 234 case. 8 heads each of dimension 48. The resulting architecture has  $\sim 1.08\text{M}$  parameters.

## 235 E Data

236 In Figure 3, we gradually increase the complexity of the task by changing the dataset:

- 237 1. *MNIST*  $\rightarrow$  *CiFAR-10* input dimensions (both spatial and number of channels) increase from  
 238 (28, 28, 1) to (32, 32, 3) while keeping the number of target labels the same. These two  
 239 datasets also have similar number of samples (60,000 and 50,000).
- 240 2. *CiFAR-10*  $\rightarrow$  *CiFAR-100* number of samples and image resolution stay constant while the  
 241 number of labels increase by a factor of 10, from 10 to 100.
- 242 3. *CiFAR-100*  $\rightarrow$  *Tiny-ImageNet* image resolution, number of labels and number of samples  
 243 double.

244 We limit this analysis to 2-4-8-Layer MLPs trained using SGD with high (0.1) or medium (0.01)  
 245 learning rate. Since we are interested in the most simple settings, we don't use any data augmentation,  
 246 which hurts generalization. Moreover, MLPs are known for their subpar performance on large scale  
 247 image classification tasks. See Table 4 for a comparison of the test accuracies across these four  
 248 datasets. We propose Equation 2 to account for this performance gap. This modification allows us to  
 249 view error barrier as a ratio of the lost performance.

Table 4: Test accuracies (%) reached on varying datasets by  $L$ -Layer MLPs trained using SGD with high (0.1) or medium (0.01)

|              | 2-Layer |       | 4-Layer |       | 8-Layer |       |
|--------------|---------|-------|---------|-------|---------|-------|
|              | High    | Med   | High    | Med   | High    | Med   |
| MNIST        | 98.32   | 98.34 | 98.41   | 98.19 | 98.41   | 97.14 |
| CiFAR-10     | *       | 54.24 | 58.75   | 55.51 | 57.44   | 54.45 |
| CiFAR-100    | *       | 26.01 | 14.26   | 27.16 | 25.33   | 20.30 |
| TinyImageNet | *       | 7.62  | 1.68    | 8.27  | 5.80    | 5.79  |
